# Supplementary material
Source: Springer Nature journal article supplement (https://www.springermedizin.de/resource/supplementary/12936_2010_1428_MOESM2_ESM.pdf/9549784)

No malaria\*

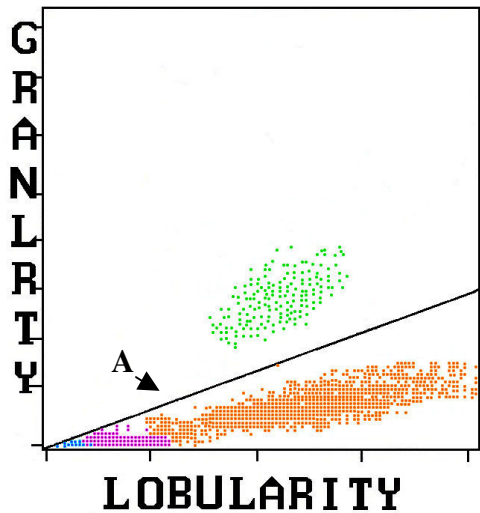

*Plasmodium falciparum*

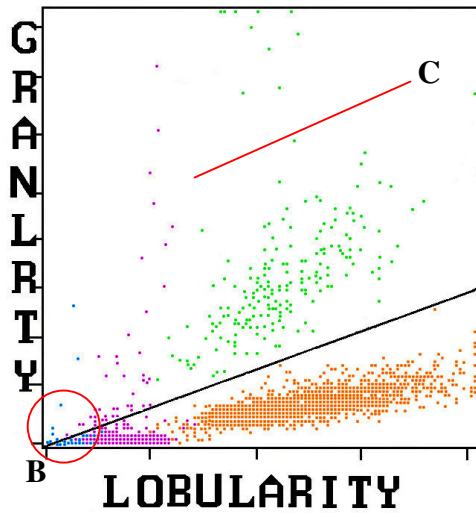

*Plasmodium vivax*

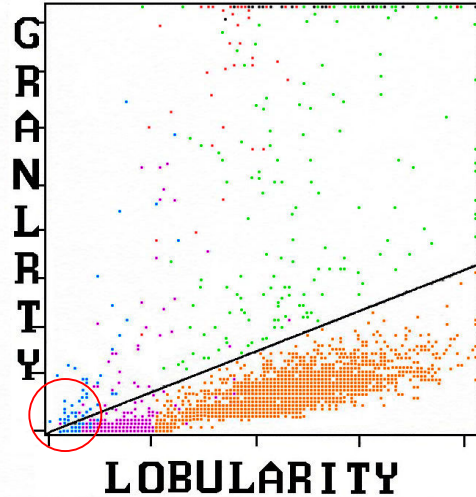

Supplement: MOESM2 [file 9549784]
